# Supplementary material
Source: PubMed Central journal article supplement (PMC3058979)
Supplement: supp_M110.170993_jbc.M110.170993-1.pdf [file supp_M110.170993_jbc.M110.170993-1.pdf]

# **Molecular Mimicry of Human Endothelial Cell Antigen by Autoantibodies to Nonstructural Protein 1 of Dengue Virus**

I-Ju Liu,<sup>1,2</sup> Chien-Yu Chiu,<sup>2</sup> Yun-Ching Chen,<sup>2</sup> and Han-Chung Wu<sup>2\*</sup>

<sup>1</sup>Graduate Institute of Life Sciences, National Defense Medical Center, Taipei 114, Taiwan, <sup>2</sup>Institute of Cellular and Organismic Biology, Academia Sinica, Taipei 115, Taiwan

## **Supplemental Information**

**Immunoaffinity purification and identification of the target of DB16-1.** COLO 205 cells ( $1 \times 10^8$ ) were lysed with lysis buffer (50 mM Tris-HCl, pH 7.4, 150 mM NaCl, 1% NP-40) supplemented with a protease inhibitor cocktail tablet (Roche) and incubated on ice for 30 min. Cell lysate was prepared at  $10,000 \times g$  for 15 min at 4°C. The supernatant was applied to protein G sepharose (GE Healthcare Biosciences) coupled with DB16-1. After washing, the proteins binding to DB16-1 were eluted with elution buffer (0.2 M Glycine, pH 2.5, 150 mM NaCl, and 1% NP-40) and the eluates were neutralized with 1 M Tris-HCl, pH 9.1. The eluates were separated in SDS-PAGE and analyzed by LC-MS/MS.
