# Supplementary material
Source: PubMed Central journal article supplement (PMC3058979)

**Figure S1:** Identification of the target protein of DB16-1 from COLO 205 cells. A. The target protein was purified from COLO 205 cell lysates by immunoaffinity chromatography using SP16-1. Peptide sequences of the target through LC-MS/MS sequencing are marked. The peptide in red highlights the sequences present in LYRIC protein. B. Co-immunoprecipitation of COLO 205 lysates with mAb DB16-1 and anti-Mid antibodies and subsequent immunoblotting with anti-Mid and DB16-1 antibodies. These two antibodies recognized the target in COLO 205 cells.

**A**

```

1 MAARSWDEL AQQAEEGSAR LREMLSVGLG FLRTELGLDL
41 GLEPKRYPGW VILVGTGALG LLLLFLLGYG WAAACAGARK
81 KRRSPPRKRE EAAAVPAAAP DDLALLKNLR SEEQKKKNRK
121 KLSEKPKPNG RTVEVAEGEA VRTPQSVTAK QPPEIDKNE
161 KSKKNKKKSK SDAKAVQNSS RHDGKEVDEG AWETKISHRE
201 KRQQRKRDKV LTDSGSLDST IPGIENTITV TTEQLITASF
241 PVGSKKNKGD SHLNVQVSNF KSGKGDSTLQ VSSGLNENLT
281 VNGGGWNEKS VKLSSQISAG EEKWNSVSPA SAGKRRKTEPS
321 AWSQDTGDAN TNGKDWGRSW SDRSIFSGIG STAEPVSQST
361 TSDYQWDVSR NQPYIDDEWS GLNGLSSADP NSDWNAPAE
401 WGNWVDEERA SLLKSQEPPI DDQKVSDDDK EKGEALPTG
441 KSKKKKKKKK KQGEDNSTAQ DTEELEKEIR EDLPVNTSKT
481 RPKQEKAFSL KTISTSDPAE VLVKNSQPIK TLPPATSTEP
521 SVILSKSDSD KSSSQVPPIL QETDKSKSNT KQNSVPPSQT
561 KSETSWESPK QIKKKKKARR ET

```

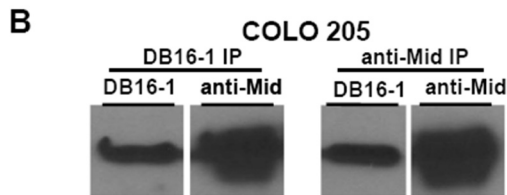

Supplement: supp_M110.170993_jbc.M110.170993-2.pdf [file supp_M110.170993_jbc.M110.170993-2.pdf]
