# Supplementary material
Source: PubMed Central journal article supplement (PMC3058979)

**Figure S2:** Expression of LYRIC on HUVECs was analyzed with DB16-1, anti-Mid, Lyric 1-7, Lyric 2-1, Lyric 3-13, and Lyric 4-7 antibodies. 4G2 antibody was used as a negative control. Cell images were acquired at 100 ×, 200 × and 400 × magnification.

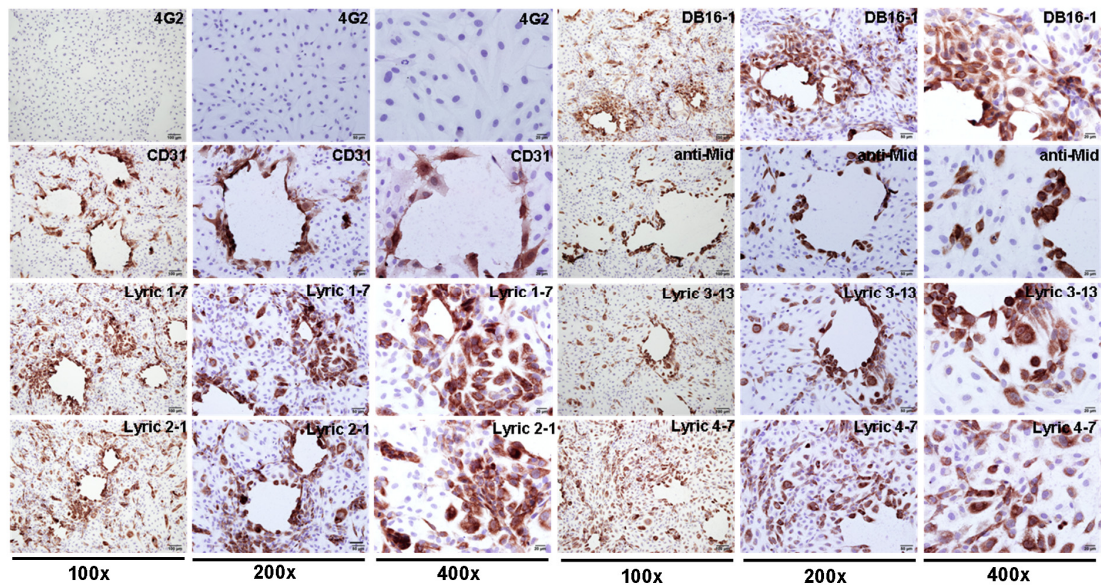

Supplement: supp_M110.170993_jbc.M110.170993-3.pdf [file supp_M110.170993_jbc.M110.170993-3.pdf]
